# Supplementary material for: Cross-Linked Gel Polymer Electrolyte Based on Multiple Epoxy Groups Enabling Conductivity and High Performance of Li-Ion Batteries
Source: MDPI journal article supplement (doi:10.3390/gels9050384), 2023-05-05
Supplement: s1 [file s1]

Supplementary materials for

**Crosslinked gel polymer electrolyte based on multiply-epoxy groups enable conductivity and electrochemical performance for Li-Ion Batteries**

Wei Zhang <sup>1,a</sup>, Wansu Bae<sup>1,a</sup>, Lei Jin<sup>1</sup>, Sungjun Park<sup>1</sup>, Minhyuk Jeon<sup>1</sup>, Whangi Kim<sup>1</sup> and Hohyoun Jang

<sup>1,\*</sup>

<sup>1</sup>Department of Applied Chemistry, Konkuk University, Chungju-si 27478, Republic of Korea

<sup>a</sup> these authors contributed equally to this work.

\*Correspondence: 200417450@kku.ac.kr (H. Jang).

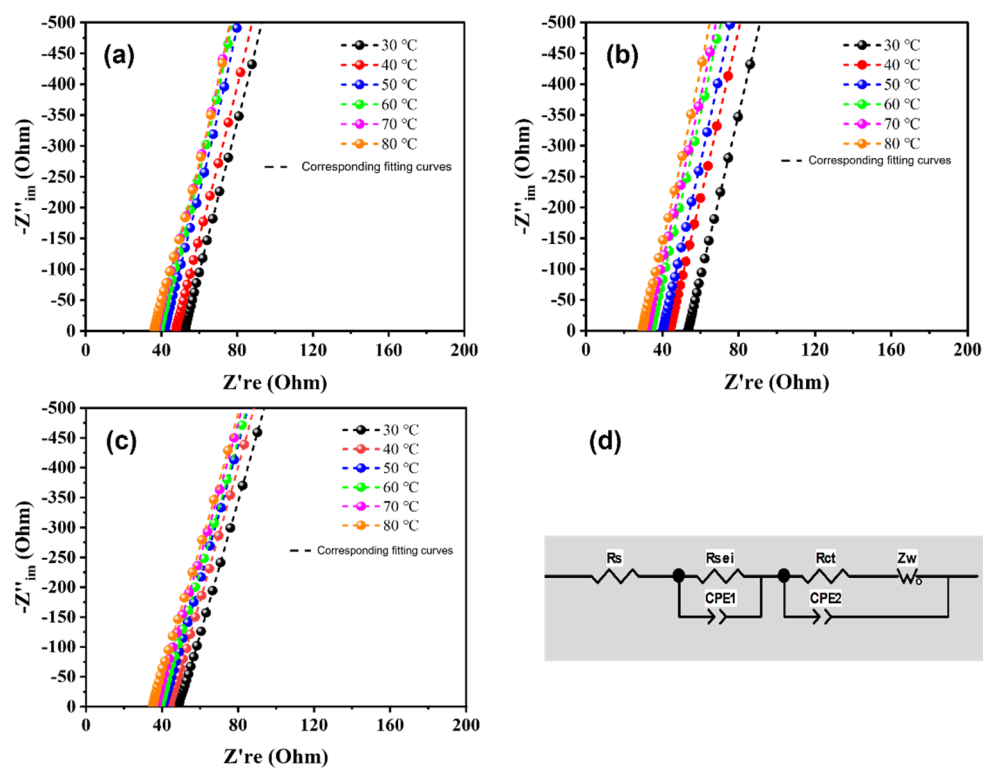

Figure S1. Nyquist plots of as-prepared C-GPE-1(a), C-GPE-2(b), and C-GPE-3(c), and corresponding an equivalent circuit(d).

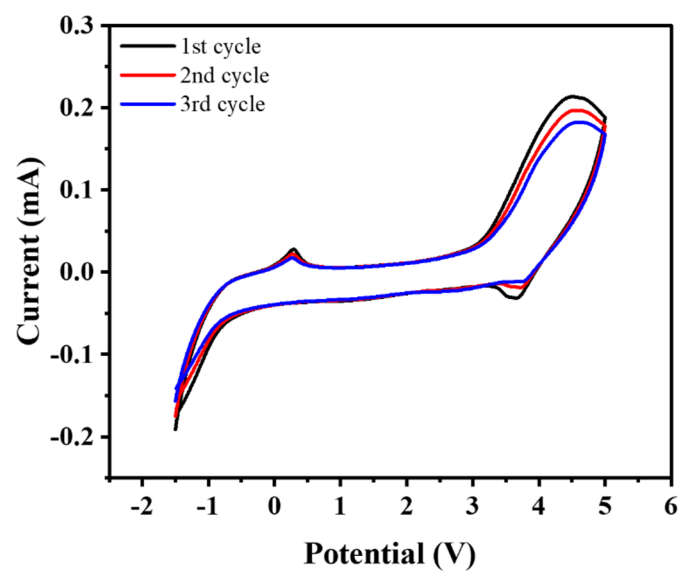

Figure S2. CV profiles of as-prepared C-GPE-4.

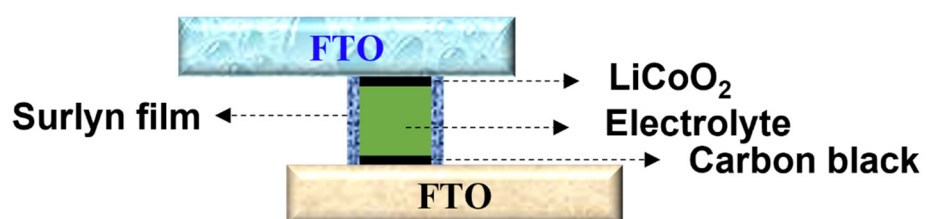

Figure S3. The schematic illustration of an asymmetric dummy cell.

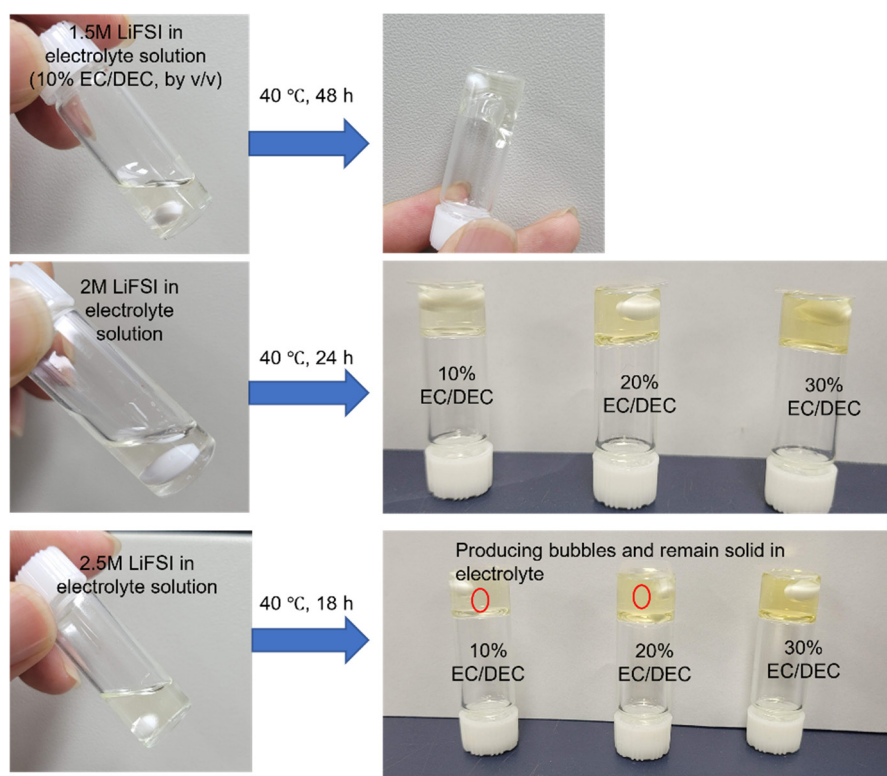

Figure S4. The digital photos of in-situ polymeric C-GPEs with varies concentrated LiFSI.

Table S1. Comparison of electrochemical properties of polymer electrolyte with epoxy group from reported works.

| Electrolyte components            | Ionic conductivity<br>(S/cm at 30 °C/ RT <sup>a</sup> ) |                       | LSV<br>(V, Li/Li <sup>+</sup> ) | Battery performances    | Ref.             |
|-----------------------------------|---------------------------------------------------------|-----------------------|---------------------------------|-------------------------|------------------|
| TMPEG, NPEG, LiTFSI               | 1.10×10 <sup>-4</sup>                                   |                       | 5.4                             | LFP, 144.8 mAh/g, 0.2C  | [1]              |
| PEE, LiTFSI, LiDFOB               | 2.36×10 <sup>-3</sup>                                   |                       | 4.5                             | NMC622, 160 mAh/g, 0.5C | [2]              |
| NGDE, LiFSI                       | 1.57×10 <sup>-3</sup>                                   |                       | 4.0                             | LFP, 131 mAh/g, 0.2C    | [3]              |
| PEGDGE, LiTFSI, LiBF <sub>4</sub> | 1.10×10 <sup>-4</sup>                                   |                       | 5.5                             | LFP, 160.2 mAh/g, 0.05C | [4]              |
| GMA, OE, LiClO <sub>4</sub>       | HPGO-70                                                 | 2.26×10 <sup>-6</sup> | 4.0-4.5                         | Li, 99 mAh/g, 0.1C      | [5]              |
|                                   | PGO-70                                                  | 2.58×10 <sup>-7</sup> |                                 |                         |                  |
| PGTE, LiDFOB                      | 4.16×10 <sup>-4</sup> at 60 °C                          |                       | 5.0                             | LFP, 135.2 mAh/g, 0.2C  | [6]              |
| C-GPE-2, LiFSI                    | 0.23×10 <sup>-3</sup>                                   |                       | 5.19                            | LFP, 161.3 mAh/g, 0.1C  | <b>This work</b> |

**Note:** 1) <sup>a</sup> Room temperature (RT)

2) LiFePO<sub>4</sub> (LFP), Trimethylolpropane triglycidyl ether (TMPEG), Poly (ethylene glycol) diamine (NPEG), Lithium bis(trifluoromethane)sulfonilimide (LiTFSI), Pentaerythritol glycidyl ether (PEE), LiNi<sub>0.6</sub>Mn<sub>0.2</sub>Co<sub>0.2</sub>O<sub>2</sub> (NMC622), Lithium difluoro(oxalate)borate (LiDFOB), Neopentyl glycol diglycidyl ether (NGDE), Poly(ethylene glycol) diglycidyl ether (PEGDGE), Lithium tetrafluoroborate (LiBF<sub>4</sub>), Glycidyl methacrylate (GMA), Oligo (ethylene oxide) methyl ether methacrylate (OE), Lithium perchlorate (LiClO<sub>4</sub>), Polymerized glycerin triglycidyl ether (PGTE)

Table S2. The composition of the as-prepared crosslinked-gel polymer electrolyte in this work

| <b>Crosslinked-Gel Polymer electrolytes<br/>(C-GPEs) names</b> | <b>ESO (mL)</b> | <b>LiFSI (g)</b> | <b>EC/DEC (mL)</b> |
|----------------------------------------------------------------|-----------------|------------------|--------------------|
| <b>C-GPE-1</b>                                                 | 2               | 0.748            | 0.2                |
| <b>C-GPE-2</b>                                                 |                 |                  | 0.4                |
| <b>C-GPE-3</b>                                                 |                 |                  | 0.6                |

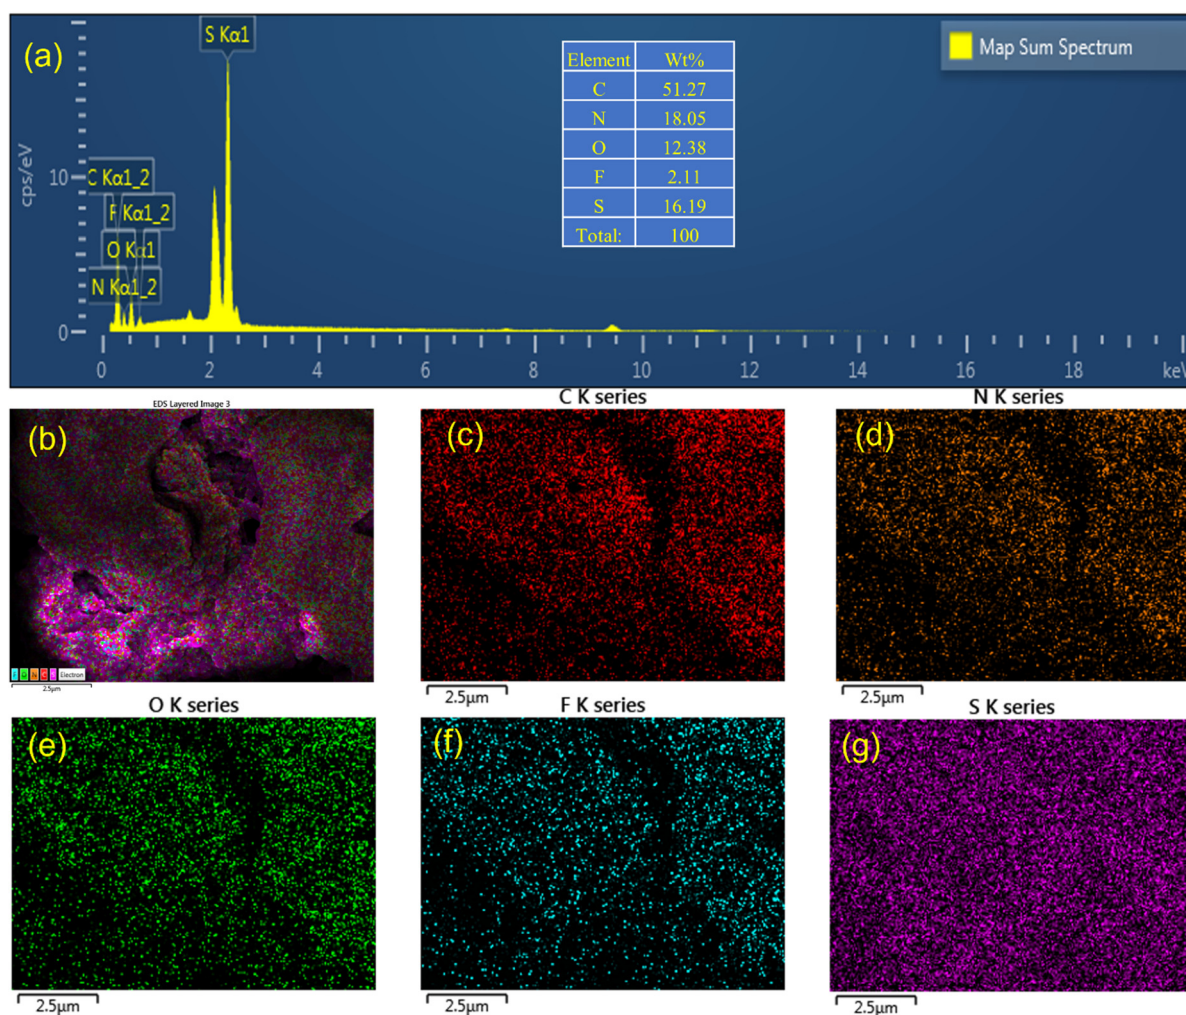

Figure S5: (a-b) Selected area of graphite anode of C-GPE-2 electrolyte based LIB (inset shows the wt% of elemental C, N, O, F, and S), and (b-g) EDS elemental mapping of C, N, O, F, and S, respectively. The graphite anode was recovered after 300 CD cycles.





## Reference

1. Chen, B.; Xu, Q.; Huang, Z.; Zhao, Y.; Chen, S.; Xu, X. One-pot preparation of new copolymer electrolytes with tunable network structure for all-solid-state lithium battery. *J. Power Sources* 2016, 331, 322-331. doi:10.1016/j.jpowsour.2016.09.063.
2. Zhu, J.; Zhang, J.; Zhao, R.; Zhao, Y.; Liu, J.; Xu, N.; Wan, X.; Li, C.; Ma, Y.; Zhang, H.; Chen, Y. In situ 3D crosslinked gel polymer electrolyte for ultra-long cycling, high-voltage, and high-safety lithium metal batteries. *Energy Storage Materials* 2023, 57, 92-101. doi:10.1016/j.ensm.2023.02.012.
3. Zhang, W.; Ryu, T.; Yoon, S.; Jin, L.; Jang, G.; Bae, W.; Kim, W.; Ahmed, F.; Jang, H. Synthesis and Characterization of Gel Polymer Electrolyte Based on Epoxy Group via Cationic Ring-Open Polymerization for Lithium-Ion Battery. *Membranes* 2022, 12, 439. doi:10.3390/membranes12040439.
4. Nair, J.R.; Shaji, I.; Ehteshami, N.; Thum, A.; Diddens, D.; Heuer, A.; Winter, M. Solid Polymer Electrolytes for Lithium Metal Battery via Thermally Induced Cationic Ring-Opening Polymerization (CROP) with an Insight into the Reaction Mechanism. *Chem. Mater.* 2019, 31, 3118-3133. doi:10.1021/acs.chemmater.8b04172.
5. Yao, W.; Zhang, Q.; Qi, F.; Zhang, J.; Liu, K.; Li, J.; Chen, W.; Du, Y.; Jin, Y.; Liang, Y.; Liu, N. Epoxy containing solid polymer electrolyte for lithium ion battery. *Electrochim. Acta* 2019, 318, 302-313. doi:10.1016/j.electacta.2019.06.069.
6. Ma, Y.; Sun, Q.; Wang, S.; Zhou, Y.; Song, D.; Zhang, H.; Shi, X.; Zhang, L. Li salt initiated in-situ polymerized solid polymer electrolyte: new insights via in-situ electrochemical impedance spectroscopy. *Chem. Eng. J.* 2022, 429, 132483. doi:10.1016/j.cej.2021.132483.
